# Supplementary material for: Competition between coordination network and halogen bond network formation: towards halogen-bond functionalised network materials using copper-iodobenzoate units
Source: Royal Society of Chemistry journal article supplement (doi:10.1039/b806765a), 2008-01-01
Supplement: b806765a.pdf [file b806765a.pdf]

## Supplementary Information

### Competition between coordination network and halogen bond network formation: towards halogen-bond functionalised network materials using copper-iodobenzoate units

Paul Smart, Guillermo Mínguez Espallargas, and Lee Brammer\*

*Department of Chemistry, University of Sheffield, Sheffield S3 7HF, UK. Email:  
lee.brammer@sheffield.ac.uk*

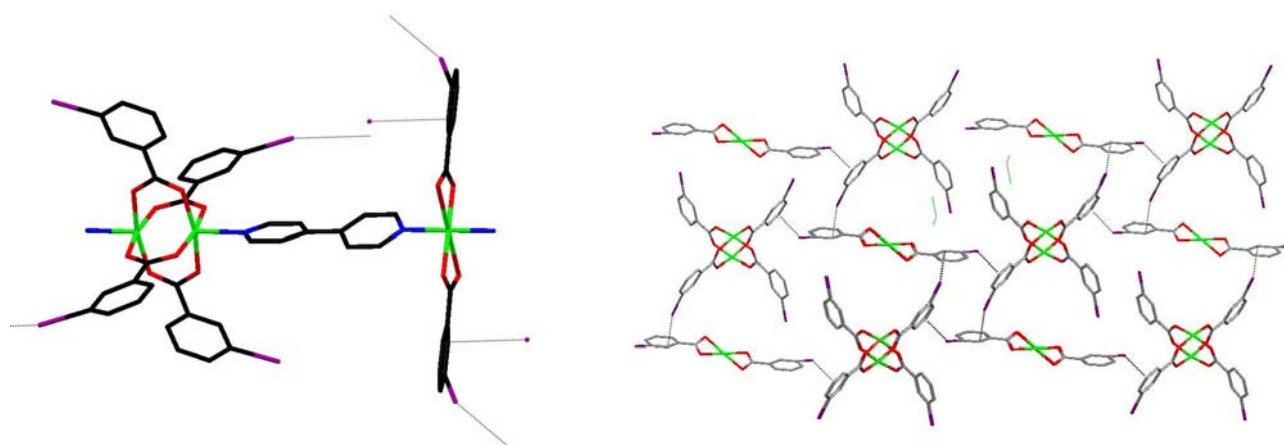

**Figure S1.** (a) Bipy linkers bridging between alternating mono- and dinuclear copper units within the 1D network from  $[\text{Cu}_2(3\text{-Ibz})_4](\mu_2\text{-}4,4'\text{-bipy})_2[\text{Cu}(3\text{-Ibz})_2]\cdot 0.68\text{CH}_2\text{Cl}_2$ , **4a** (for clarity hydrogen atoms not shown).  $\text{C}\text{-I}\cdots\pi$  halogen bonds and  $\text{C}\text{-I}\cdots\text{I}$  interactions shown as dashed lines.

(b) 2D network propagated by  $\text{C}\text{-I}\cdots\pi$  and  $\text{C}\text{-I}\cdots\text{I}\text{-C}$  halogen bonds. Bipy ligands and hydrogen atoms are omitted for clarity. The locations of two  $\text{CH}_2\text{Cl}_2$  solvent molecules are illustrated.
